# Supplementary material for: Trends in Cardiovascular Health Metrics in Obese Adults: National Health and Nutrition Examination Survey (NHANES), 1988–2014
Source: PubMed Central journal article supplement — J Am Heart Assoc. 2016 Jul 13;5(7):e003619. doi: 10.1161/JAHA.116.003619 (PMC5015398; doi:10.1161/jaha.116.003619), 2016-07-13
Supplement: JAH3-5-e003619-s001.pdf [file JAH3-5-e003619-s001.pdf]

## Supplemental Material

Table S1. Secular trends in systolic blood pressure in obese adults during NHANES 1988-2014 (N=17,393).

|                     | Mean (95% CI)         |                       |                       |                       |                       | p value* |
|---------------------|-----------------------|-----------------------|-----------------------|-----------------------|-----------------------|----------|
|                     | 1988-1992<br>(n=4016) | 1999-2002<br>(n=2696) | 2003-2006<br>(n=2830) | 2007-2010<br>(n=4058) | 2011-2014<br>(n=3793) |          |
| All                 | 126.1 (125.2-127.0)   | 126.6 (125.5-127.7)   | 125.7 (124.7-126.7)   | 123.2 (122.4-123.9)   | 124.4 (123.6-125.2)   | <0.001   |
| 20-39 y             | 117.8 (116.5-119.2)   | 118.3 (116.5-120.1)   | 118.8 (117.6-119.9)   | 118.1 (117.2-119.0)   | 119.1 (118.2-120.1)   | 0.6      |
| 40-59 y             | 126.9 (125.4-128.3)   | 127.0 (125.7-128.3)   | 126.1 (124.8-127.3)   | 123.8 (122.6-124.9)   | 124.7 (123.5-125.9)   | <0.001   |
| 60+ y               | 136.9 (135.6-138.2)   | 138.2 (136.1-140.2)   | 135.2 (133.4-137.1)   | 129.5 (128.2-130.8)   | 131.6 (130.1-133.1)   | <0.001   |
| Men                 | 128.3 (127.1-129.6)   | 127.2 (125.9-128.5)   | 126.8 (125.6-128.0)   | 124.7 (123.7-125.8)   | 126.5 (125.5-127.6)   | 0.048    |
| Women               | 124.6 (123.5-125.6)   | 126.2 (124.9-127.4)   | 124.6 (123.5-125.8)   | 121.6 (120.7-122.5)   | 122.5 (121.4-123.6)   | <0.001   |
| non-Hispanic Whites | 126.0 (125.0-127.0)   | 126.1 (124.8-127.4)   | 125.1 (123.9-126.2)   | 122.8 (121.8-123.7)   | 123.8 (122.9-124.6)   | <0.001   |
| non-Hispanic Blacks | 129.9 (129.1-130.7)   | 130.8 (129.1-132.4)   | 129.3 (128.0-130.6)   | 126.4 (124.7-128.0)   | 127.8 (126.2-129.4)   | 0.004    |
| Mexican Americans   | 125.7 (125.0-126.5)   | 126.5 (124.8-128.2)   | 126.3 (124.7-128.0)   | 124.3 (122.8-125.8)   | 124.0 (122.6-125.5)   | 0.047    |

Systolic blood pressure is showed in the unit of mmHg.

\*: p value for trends, adjusted for age group, sex, and race/ethnicity when appropriate.

Table S2. Secular trends in diastolic blood pressure in obese adults during NHANES 1988-2014 (N=17,325).

|                     | Mean (95% CI)         |                       |                       |                       |                       | p value* |
|---------------------|-----------------------|-----------------------|-----------------------|-----------------------|-----------------------|----------|
|                     | 1988-1992<br>(n=4016) | 1999-2002<br>(n=2684) | 2003-2006<br>(n=2814) | 2007-2010<br>(n=4036) | 2011-2014<br>(n=3775) |          |
| All                 | 76.6 (76.0-77.2)      | 74.4 (73.4-75.3)      | 72.5 (71.9-73.0)      | 71.5 (70.6-72.4)      | 72.5 (71.9-73.1)      | <0.001   |
| 20-39 y             | 76.8 (75.9-77.7)      | 73.0 (71.4-74.6)      | 71.2 (70.3-72.1)      | 71.4 (70.3-72.5)      | 72.3 (71.5-73.1)      | 0.001    |
| 40-59 y             | 78.9 (78.0-79.9)      | 77.9 (77.1-78.6)      | 76.6 (75.8-77.4)      | 75.2 (74.3-76.1)      | 75.6 (74.9-76.4)      | <0.001   |
| 60+ y               | 72.8 (71.7-74.0)      | 71.1 (70.0-72.2)      | 68.2 (67.2-69.3)      | 66.0 (64.7-67.3)      | 68.2 (67.3-69.1)      | <0.001   |
| Men                 | 79.9 (78.9-80.8)      | 76.8 (75.6-77.9)      | 74.0 (73.2-74.9)      | 73.6 (72.6-74.5)      | 74.3 (73.5-75.1)      | <0.001   |
| Women               | 74.3 (73.7-75.0)      | 72.5 (71.6-73.4)      | 71.0 (70.4-71.7)      | 69.7 (68.7-70.6)      | 71.0 (70.3-71.6)      | <0.001   |
| non-Hispanic Whites | 76.9 (76.1-77.7)      | 74.3 (73.2-75.4)      | 72.5 (71.8-73.3)      | 71.6 (70.6-72.6)      | 72.9 (72.1-73.7)      | <0.001   |
| non-Hispanic Blacks | 76.9 (76.0-77.8)      | 75.0 (73.8-76.2)      | 73.4 (72.2-74.5)      | 72.3 (70.9-73.7)      | 72.6 (71.2-73.9)      | <0.001   |
| Mexican Americans   | 76.0 (75.2-76.9)      | 74.5 (73.4-75.6)      | 71.2 (70.4-71.9)      | 70.6 (69.3-72.0)      | 71.3 (70.2-72.5)      | <0.001   |

Diastolic blood pressure is showed in the unit of mmHg.

\*: p value for trends, adjusted for age group, sex, and race/ethnicity when appropriate.

Table S3. Secular trends in ideal blood pressure health in obese during NHANES 1988-2014 (N=18,626).

|                     | Prevalence (%; 95% CI) |                       |                       |                       |                       | p value* |
|---------------------|------------------------|-----------------------|-----------------------|-----------------------|-----------------------|----------|
|                     | 1988-1992<br>(n=4297)  | 1999-2002<br>(n=2854) | 2003-2006<br>(n=3185) | 2007-2010<br>(n=4334) | 2011-2014<br>(n=3956) |          |
| All                 | 32.3 (30.1-34.4)       | 30.6 (28.8-32.5)      | 33.1 (30.8-35.5)      | 32.8 (30.4-35.2)      | 31.7 (29.6-33.8)      | 0.6      |
| 20-39 y             | 50.1 (45.7-54.5)       | 50.0 (45.3-54.7)      | 55.0 (50.8-59.1)      | 52.2 (48.5-55.9)      | 51.1 (47.7-54.5)      | 0.57     |
| 40-59 y             | 26.0 (23.0-29.0)       | 25.7 (23.2-28.3)      | 25.0 (21.7-28.2)      | 27.0 (23.5-30.5)      | 27.2 (24.1-30.4)      | 0.35     |
| 60+ y               | 15.7 (13.2-18.3)       | 9.9 (7.5-12.4)        | 13.7 (11.4-16.0)      | 13.3 (11.1-15.5)      | 10.2 (7.3-13.1)       | 0.33     |
| Men                 | 24.0 (20.0-28.0)       | 22.5 (19.2-25.7)      | 27.5 (24.5-30.6)      | 25.9 (23.0-28.8)      | 25.0 (22.0-28.1)      | 0.59     |
| Women               | 38.2 (34.9-41.4)       | 36.7 (34.4-39.0)      | 38.2 (35.2-41.2)      | 39.1 (36.6-41.6)      | 37.5 (34.5-40.5)      | 0.76     |
| non-Hispanic Whites | 31.9 (29.0-34.8)       | 29.4 (26.7-32.1)      | 32.4 (29.0-35.8)      | 32.2 (29.2-35.2)      | 31.3 (28.6-34.0)      | 0.43     |
| non-Hispanic Blacks | 28.5 (26.1-30.8)       | 26.5 (23.6-29.5)      | 30.5 (27.2-33.9)      | 29.3 (25.9-32.7)      | 27.3 (24.0-30.7)      | 0.79     |
| Mexican Americans   | 38.4 (34.9-41.9)       | 38.9 (34.4-43.4)      | 39.2 (34.9-43.6)      | 36.1 (31.2-41.0)      | 37.9 (34.1-41.7)      | 0.73     |

Ideal blood pressure health: untreated systolic blood pressure <120 mmHg and diastolic <80.

Prevalence was age-adjusted by the direct method to the year 2010 Census population using age groups 20-39 y, 40-59 y, and 60+ y.

\*: p value for trends, adjusted for age group, sex, and race/ethnicity when appropriate.

Table S4. Secular trends in HbA1c in obese adults during NHANES 1988-2014 (N=17,773).

|                     | Mean (95% CI)         |                       |                       |                       |                       | p value* |
|---------------------|-----------------------|-----------------------|-----------------------|-----------------------|-----------------------|----------|
|                     | 1988-1992<br>(n=4108) | 1999-2002<br>(n=2741) | 2003-2006<br>(n=3031) | 2007-2010<br>(n=4091) | 2011-2014<br>(n=3802) |          |
| All                 | 5.7 (5.6-5.8)         | 5.7 (5.7-5.7)         | 5.7 (5.6-5.7)         | 5.8 (5.8-5.9)         | 5.9 (5.8-5.9)         | <0.001   |
| 20-39 y             | 5.3 (5.2-5.3)         | 5.3 (5.3-5.4)         | 5.4 (5.3-5.4)         | 5.5 (5.4-5.5)         | 5.5 (5.4-5.5)         | <0.001   |
| 40-59 y             | 5.8 (5.7-6.0)         | 5.8 (5.7-5.9)         | 5.8 (5.7-5.8)         | 6.0 (5.9-6.1)         | 6.0 (5.9-6.1)         | <0.001   |
| 60+ y               | 6.1 (6.0-6.1)         | 6.1 (6.0-6.2)         | 6.0 (5.9-6.1)         | 6.2 (6.1-6.3)         | 6.2 (6.1-6.3)         | 0.005    |
| Men                 | 5.7 (5.6-5.8)         | 5.8 (5.7-5.9)         | 5.7 (5.7-5.8)         | 5.9 (5.8-5.9)         | 5.9 (5.8-6.0)         | 0.005    |
| Women               | 5.7 (5.6-5.8)         | 5.6 (5.6-5.7)         | 5.7 (5.6-5.7)         | 5.8 (5.8-5.9)         | 5.8 (5.8-5.9)         | <0.001   |
| non-Hispanic Whites | 5.6 (5.5-5.7)         | 5.6 (5.5-5.7)         | 5.6 (5.5-5.6)         | 5.7 (5.7-5.8)         | 5.8 (5.7-5.8)         | <0.001   |
| non-Hispanic Blacks | 6.1 (6.0-6.2)         | 6.0 (5.9-6.1)         | 6.0 (5.9-6.0)         | 6.1 (6.0-6.2)         | 6.1 (6.0-6.1)         | 0.19     |
| Mexican Americans   | 5.9 (5.8-6.0)         | 5.8 (5.7-5.9)         | 6.0 (5.9-6.2)         | 6.0 (5.9-6.1)         | 6.1 (5.9-6.2)         | 0.004    |

HbA1c is showed in the unit of %.

\*: p value for trends, adjusted for age group, sex, and race/ethnicity when appropriate.

Table S5. Secular trends in prevalence of diabetes in obese adults during NHANES 1988-2014 (N=18,626).

|                     | Prevalence (%; 95% CI) |                       |                       |                       |                       | p value* |
|---------------------|------------------------|-----------------------|-----------------------|-----------------------|-----------------------|----------|
|                     | 1988-1992<br>(n=4297)  | 1999-2002<br>(n=2854) | 2003-2006<br>(n=3185) | 2007-2010<br>(n=4334) | 2011-2014<br>(n=3956) |          |
| All                 | 11.3 (9.9-12.7)        | 14.1 (12.7-15.6)      | 16.5 (14.9-18.1)      | 19.4 (17.4-21.3)      | 19.0 (17.5-20.6)      | <0.001   |
| 20-39 y             | 3.0 (1.8-4.1)          | 4.5 (2.9-6.2)         | 5.8 (3.9-7.7)         | 5.1 (4.0-6.2)         | 5.5 (4.1-6.9)         | 0.23     |
| 40-59 y             | 13.6 (10.5-16.8)       | 14.5 (12.0-17.0)      | 16.7 (14.6-18.8)      | 21.7 (19.0-24.5)      | 21.6 (17.9-25.3)      | <0.001   |
| 60+ y               | 19.9 (17.6-22.3)       | 27.5 (24.3-30.7)      | 31.7 (27.8-35.5)      | 36.5 (31.5-41.5)      | 34.9 (32.2-37.5)      | <0.001   |
| Men                 | 12.1 (9.7-14.5)        | 16.0 (13.0-19.0)      | 16.8 (14.8-18.8)      | 19.8 (17.9-21.7)      | 19.9 (17.5-22.4)      | 0.002    |
| Women               | 10.7 (9.2-12.1)        | 12.7 (11.2-14.3)      | 16.3 (14.3-18.4)      | 19.0 (16.5-21.6)      | 18.4 (16.8-20.0)      | <0.001   |
| non-Hispanic Whites | 9.8 (8.1-11.5)         | 12.1 (10.8-13.4)      | 14.3 (12.6-16.0)      | 17.1 (14.7-19.6)      | 16.9 (15.0-18.8)      | <0.001   |
| non-Hispanic Blacks | 17.2 (15.2-19.2)       | 20.3 (17.5-23.2)      | 21.7 (18.6-24.7)      | 26.4 (24.0-28.8)      | 23.4 (20.5-26.4)      | 0.01     |
| Mexican Americans   | 16.8 (14.3-19.3)       | 17.7 (15.3-20.1)      | 24.1 (20.0-28.2)      | 23.5 (20.7-26.3)      | 23.5 (20.6-26.4)      | 0.04     |

Diabetes: self-reported of diabetes diagnosed by their doctors or HbA1c  $\geq 6.5\%$ .

Prevalence was age-adjusted by the direct method to the year 2010 Census population using age groups 20-39 y, 40-59 y, and 60+ y.

\*: p value for trends, adjusted for age group, sex, and race/ethnicity when appropriate.

Table S6. Secular trends in total cholesterol in obese adults during NHANES 1988-2014 (N=17,560).

|                     | Mean (95% CI)         |                       |                       |                       |                       | p value* |
|---------------------|-----------------------|-----------------------|-----------------------|-----------------------|-----------------------|----------|
|                     | 1988-1992<br>(n=4064) | 1999-2002<br>(n=2691) | 2003-2006<br>(n=3008) | 2007-2010<br>(n=4053) | 2011-2014<br>(n=3744) |          |
| All                 | 214.5 (212.7-216.3)   | 206.7 (204.6-208.7)   | 201.8 (200.0-203.5)   | 196.9 (195.1-198.7)   | 193.7 (192.3-195.1)   | <0.001   |
| 20-39 y             | 200.7 (197.3-204.1)   | 196.4 (193.1-199.7)   | 196.3 (193.1-199.5)   | 195.5 (192.6-198.3)   | 189.5 (186.3-192.6)   | <0.001   |
| 40-59 y             | 218.4 (215.4-221.3)   | 212.7 (209.4-216.0)   | 207.7 (204.4-211.1)   | 202.3 (199.0-205.7)   | 201.2 (198.3-204.0)   | <0.001   |
| 60+ y               | 228.6 (225.7-231.5)   | 212.5 (209.3-215.7)   | 200.7 (196.9-204.5)   | 190.7 (187.9-193.4)   | 188.5 (185.3-191.7)   | <0.001   |
| Men                 | 210.9 (207.7-214.1)   | 205.0 (201.5-208.5)   | 199.9 (197.9-201.9)   | 194.9 (192.3-197.6)   | 190.8 (188.0-193.5)   | <0.001   |
| Women               | 216.9 (214.3-219.5)   | 207.7 (205.5-210.0)   | 203.1 (200.5-205.8)   | 198.2 (195.4-201.1)   | 195.9 (194.2-197.7)   | <0.001   |
| non-Hispanic Whites | 216.2 (213.9-218.6)   | 207.8 (205.2-210.4)   | 203.2 (201.2-205.3)   | 197.2 (194.9-199.6)   | 194.5 (192.4-196.7)   | <0.001   |
| non-Hispanic Blacks | 211.6 (208.9-214.2)   | 203.7 (199.8-207.5)   | 197.0 (193.7-200.2)   | 194.9 (192.0-197.7)   | 189.2 (186.5-191.9)   | <0.001   |
| Mexican Americans   | 210.7 (207.6-213.7)   | 202.5 (198.7-206.3)   | 198.9 (194.3-203.5)   | 198.9 (196.0-201.9)   | 193.2 (189.6-196.9)   | 0.003    |

Total cholesterol is showed in the unit of mg/dL.

\*: p value for trends, adjusted for age group, sex, and race/ethnicity when appropriate.

Table S7. Secular trends in HDL cholesterol in obese adults during NHANES 1988-2014 (N=17,525).

|                     | Mean (95% CI)         |                       |                       |                       |                       | p value* |
|---------------------|-----------------------|-----------------------|-----------------------|-----------------------|-----------------------|----------|
|                     | 1988-1992<br>(n=4029) | 1999-2002<br>(n=2691) | 2003-2006<br>(n=3008) | 2007-2010<br>(n=4053) | 2011-2014<br>(n=3744) |          |
| All                 | 45.4 (44.7-46.2)      | 46.0 (45.2-46.8)      | 48.7 (48.0-49.3)      | 46.4 (45.7-47.0)      | 47.4 (46.8-48.1)      | 0.001    |
| 20-39 y             | 44.4 (43.0-45.8)      | 44.5 (43.6-45.4)      | 47.1 (46.1-48.1)      | 44.6 (43.6-45.6)      | 45.6 (44.6-46.5)      | 0.15     |
| 40-59 y             | 44.8 (43.6-46.0)      | 45.5 (44.2-46.8)      | 48.1 (47.2-49.0)      | 46.1 (45.2-47.0)      | 47.5 (46.6-48.3)      | 0.007    |
| 60+ y               | 47.9 (46.7-49.1)      | 48.8 (47.9-49.8)      | 51.7 (50.6-52.8)      | 49.4 (48.6-50.2)      | 50.2 (49.2-51.1)      | 0.033    |
| Men                 | 40.2 (39.1-41.4)      | 40.6 (39.6-41.5)      | 43.4 (42.8-44.0)      | 41.4 (40.8-41.9)      | 42.6 (41.8-43.4)      | 0.007    |
| Women               | 49.3 (48.5-50.1)      | 50.1 (48.9-51.2)      | 53.2 (52.1-54.3)      | 50.8 (50.0-51.7)      | 51.5 (50.7-52.3)      | 0.031    |
| non-Hispanic Whites | 44.3 (43.4-45.2)      | 44.9 (43.8-46.0)      | 47.7 (47.0-48.3)      | 45.2 (44.6-45.9)      | 47.0 (46.2-47.8)      | 0.001    |
| non-Hispanic Blacks | 51.1 (50.1-52.2)      | 51.3 (49.8-52.8)      | 53.9 (52.7-55.1)      | 52.0 (50.7-53.3)      | 51.2 (50.4-52.0)      | 0.89     |
| Mexican Americans   | 45.1 (44.3-45.9)      | 45.4 (44.5-46.3)      | 47.8 (46.4-49.2)      | 46.1 (45.2-46.9)      | 46.4 (45.6-47.2)      | 0.18     |

HDL cholesterol is showed in the unit of mg/dL.

\*: p value for trends, adjusted for age group, sex, and race/ethnicity when appropriate.



Table S8. Secular trends in ideal blood lipid health in obese adults during NHANES 1988-2014 (N=18,626).

|                     | Prevalence (% , 95% CI) |                       |                       |                       |                       | p value* |
|---------------------|-------------------------|-----------------------|-----------------------|-----------------------|-----------------------|----------|
|                     | 1988-1992<br>(n=4297)   | 1999-2002<br>(n=2854) | 2003-2006<br>(n=3185) | 2007-2010<br>(n=4334) | 2011-2014<br>(n=3956) |          |
| All                 | 3.3 (2.3-4.3)           | 3.8 (2.9-4.7)         | 5.2 (4.1-6.3)         | 4.9 (4.1-5.7)         | 4.8 (4.0-5.6)         | 0.022    |
| 20-39 y             | 4.5 (2.3-6.8)           | 4.2 (2.7-5.7)         | 6.5 (4.7-8.3)         | 5.5 (3.8-7.1)         | 5.0 (3.9-6.0)         | 0.48     |
| 40-59 y             | 3.0 (1.9-4.0)           | 4.0 (2.4-5.6)         | 4.1 (2.6-5.6)         | 4.4 (3.2-5.6)         | 5.0 (3.5-6.5)         | 0.14     |
| 60+ y               | 2.0 (0.9-3.1)           | 2.9 (1.9-3.9)         | 5.0 (3.4-6.5)         | 4.8 (3.8-5.7)         | 4.5 (3.0-5.9)         | 0.02     |
| Men                 | 1.5 (0.6-2.3)           | 0.9 (0.4-1.4)         | 2.3 (1.4-3.1)         | 2.0 (1.3-2.7)         | 2.5 (1.5-3.5)         | 0.028    |
| Women               | 4.7 (3.1-6.2)           | 6.0 (4.5-7.5)         | 7.7 (6.0-9.4)         | 7.4 (6.2-8.6)         | 6.8 (5.5-8.0)         | 0.16     |
| non-Hispanic Whites | 2.6 (1.2-4.0)           | 2.5 (1.4-3.5)         | 4.6 (3.1-6.0)         | 4.1 (3.2-5.0)         | 4.1 (2.9-5.3)         | 0.026    |
| non-Hispanic Blacks | 6.4 (5.2-7.6)           | 7.7 (6.0-9.5)         | 9.0 (7.4-10.6)        | 8.2 (6.2-10.2)        | 8.7 (7.2-10.2)        | 0.12     |
| Mexican Americans   | 3.1 (2.1-4.2)           | 3.4 (1.8-5.1)         | 5.5 (3.3-7.6)         | 4.7 (3.2-6.2)         | 5.3 (3.8-6.9)         | 0.087    |

Ideal blood lipid health: untreated total cholesterol <200 mg/dL, and HDL ≥60 mg/dL.

Prevalence was age-adjusted by the direct method to the year 2010 Census population using age groups 20-39 y, 40-59 y, and 60+ y.

\*: p value for trends, adjusted for age group, sex, and race/ethnicity when appropriate.
